# Supplementary material for: Structural Characterization and Expression Analysis of the SERK/SERL Gene Family in Rice (Oryza sativa)
Source: PubMed Central journal article supplement (PMC2742738; doi:10.1155/2009/539402), 2009-09-13
Supplement: 539402.f2.pdf [file 539402.f2.pdf]

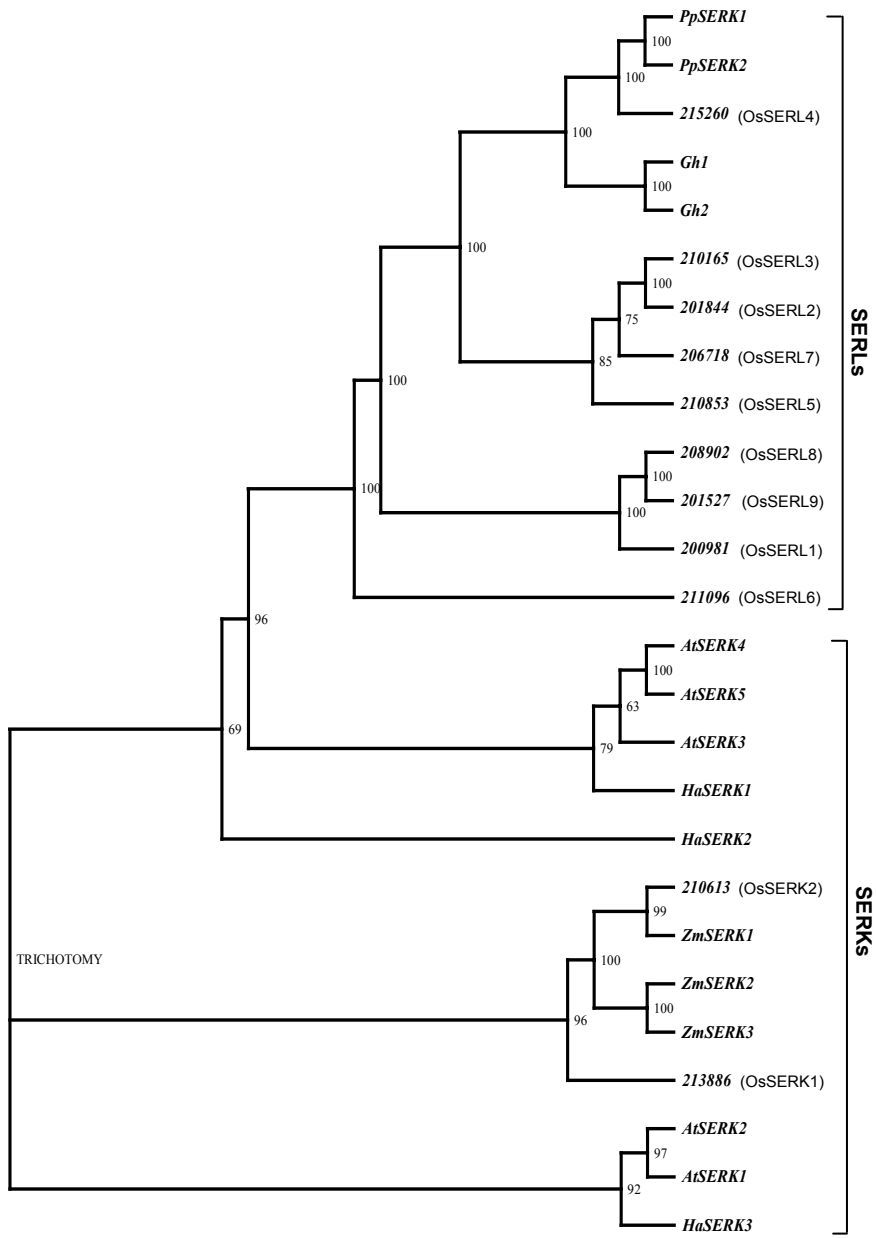

Supp. Fig. 2
